# Supplementary material
Source: PubMed Central journal article supplement (PMC5396465)
Supplement: NIHMS855172-supplement-Supplemental_Data.pdf [file NIHMS855172-supplement-Supplemental_Data.pdf]

## **Supplementary Information**

# **Two-color lateral flow assay for multiplex detection of causative agents behind acute febrile illnesses**

Seoho Lee<sup>1,2</sup>, Saurabh Mehta<sup>2,3\*</sup>, David Erickson<sup>1,2\*</sup>

<sup>1</sup> Sibley School of Mechanical and Aerospace Engineering, Cornell University, Ithaca, NY 14853, USA

<sup>2</sup> Institute of Nutritional Sciences, Global Health, and Technology (INSiGHT)

<sup>3</sup> Division of Nutritional Sciences, Cornell University, Ithaca, NY 14853, USA

\*Co-corresponding authors: [de54@cornell.edu](mailto:de54@cornell.edu); [sm939@cornell.edu](mailto:sm939@cornell.edu)

## **Table of Contents**

### ***Blue and Red latex based detection probe preparation***

The latex based detection probes used in the study were prepared by labelling the anti-IgG antibodies (goat anti-rabbit IgG secondary antibody,  $\gamma$ -chain specific; Jackson ImmunoResearch Laboratories, Inc.) with Blue latex beads (LATEX conjugation kit – 400nm Blue; Innova Biosciences Ltd.), and anti-IgM antibodies (goat anti-mouse IgM secondary antibody,  $\mu$ -chain specific; Sigma Aldrich Co.) with Red latex beads (LATEX conjugation kit – 400nm Red; Innova Biosciences Ltd.). Before the conjugation procedures, a buffer exchange for the antibody solutions (AbPure Antibody Concentration and Clean-up Kit; Innova Biosciences Ltd.) was performed which removed small interfering substances such as azide and tris from the solutions, and transferred the antibodies to an amine-free buffer (10mM MES buffer at pH 7) that is compatible with the subsequent conjugation procedures. The conjugation was carried out by adding 40 $\mu$ l of the anti-IgG at 0.1mg/ml to the 0.4mg of the pre-treated 400nm Blue polystyrene latex beads. The antibodies covalently bound to the surface of the latex beads via lysine residues during the 15min incubation at room temperature, and the reaction was quenched by adding 1mL of 0.01M tris-buffered saline (TBS) with 0.1% Tween 20. The Blue latex–anti-IgG conjugates were spun at 10,000 rpm for 9 min to remove any of the unbound antibodies, reconstituted to 1% and stored at 4°C until use. The above conjugated steps were repeated for anti-IgM and 400nm Red polystyrene latex beads, yielding 1% red latex–anti-IgM conjugates.

To prepare the conjugate pad that dry-stores the red and blue latex based probes, the probes were first diluted to 0.4% in the conjugate buffer (2mM borate buffer with 5% sucrose), and then used to fully immerse the Glass Fibre Conjugate Pads (EMD Millipore) with 10cm x 5mm dimensions. The conjugate pad was dried at 37°C for 5h and stored until being assembled in to the lateral flow assay.

### ***Assay procedures***

In the testing of the two-color lateral flow assay, 10 $\mu$ l of the sample was first dispensed onto the sample pad of the test strip, where the sample may be: rabbit anti-CHIKV IgG (Integrated BioTherapeutics, Inc.), mouse anti-CHIKV IgM (United States Biological), rabbit anti-DENV IgG (LifeSpan BioSciences, Inc.), and/or mouse anti-DENV 4 IgM (antibodies-online). Subsequently 80 $\mu$ l of the chase buffer (1x TBS with 1% BSA, 1.5% Tween 20, 0.1% sodium azide) was dispensed which initiated the sample flow through the length of the test strip. For the duplex IgG/IgM detection for CHIKV (Section 3.2), the anti-CHIKV IgG and IgM samples of 150, 300, 450 and 600 $\mu$ g/ml were prepared by diluting with 1x PBS. For the 4-plex IgG/IgM detection for CHIKV and DENV (Section 3.3), the anti-CHIKV IgG/IgM and anti-DENV IgG/IgM samples at 600  $\mu$ g/ml in 1x PBS were prepared and used.

**Table S.1** Test region red/green/blue/hue intensities at different CHIKV IgG/IgM concentrations

| <b>CHIKV IgG/IgM concentration</b> | <b>R intensity*</b> | <b>G intensity*</b> | <b>B intensity*</b> | <b>Hue intensity</b> |
|------------------------------------|---------------------|---------------------|---------------------|----------------------|
| 0/600                              | 159.32              | 210.35              | 250.36              | 206.36               |
| 150/450                            | 169.29              | 197.84              | 242.06              | 216.45               |
| 300/300                            | 184.79              | 200.85              | 237.46              | 221.70               |
| 450/150                            | 200.41              | 197.51              | 231.28              | 245.15               |
| 600/0                              | 204.44              | 183.71              | 225.19              | 269.97               |

\*average values; in range 0-255

**Table S.2** Test region red/green/blue/hue intensities for different test strip/regions in 4-plex testing

| Test Strip/Region ID |       | R intensity*                       | G intensity* | B intensity* | Hue intensity |
|----------------------|-------|------------------------------------|--------------|--------------|---------------|
| ①                    | DENV  | 212.204                            | 204.518      | 224.618      | 262.9433      |
|                      | CHIKV | 216.733                            | 201.066      | 223.519      | 281.8661      |
| ②                    | DENV  | 214.554                            | 191.094      | 240.343      | 268.5813      |
|                      | CHIKV | Test region did not develop colors |              |              |               |
| ③                    | DENV  | Test region did not develop colors |              |              |               |
|                      | CHIKV | 213.846                            | 160.614      | 223.378      | 290.8878      |
| ④                    | DENV  | 172.494                            | 223.006      | 252.575      | 202.1543      |
|                      | CHIKV | 158.632                            | 218.455      | 249.947      | 200.6923      |
| ⑤                    | DENV  | 164.7                              | 216.083      | 251.02       | 204.2843      |
|                      | CHIKV | Test region did not develop colors |              |              |               |
| ⑥                    | DENV  | Test region did not develop colors |              |              |               |
|                      | CHIKV | 135.397                            | 200.066      | 245.636      | 204.8025      |
| ⑦                    | DENV  | 140.068                            | 193.353      | 244.441      | 209.3685      |
|                      | CHIKV | 209.939                            | 175.355      | 230.87       | 277.378       |
| ⑧                    | DENV  | 203.236                            | 177.782      | 227.576      | 270.6712      |
|                      | CHIKV | 160.929                            | 203.087      | 243.918      | 209.5203      |
| ⑩                    | DENV  | 211.813                            | 186.983      | 241.995      | 267.0814      |
|                      | CHIKV | 165.725                            | 182.562      | 251.312      | 228.1966      |
| ⑪                    | DENV  | 170.395                            | 185.021      | 241.316      | 227.6262      |
|                      | CHIKV | 207.526                            | 174.821      | 233.403      | 273.4966      |
| ⑫                    | DENV  | 180.676                            | 182.326      | 240.405      | 238.3425      |
|                      | CHIKV | 113.967                            | 198.994      | 248.89       | 202.1887      |

\*average values; in range 0-255

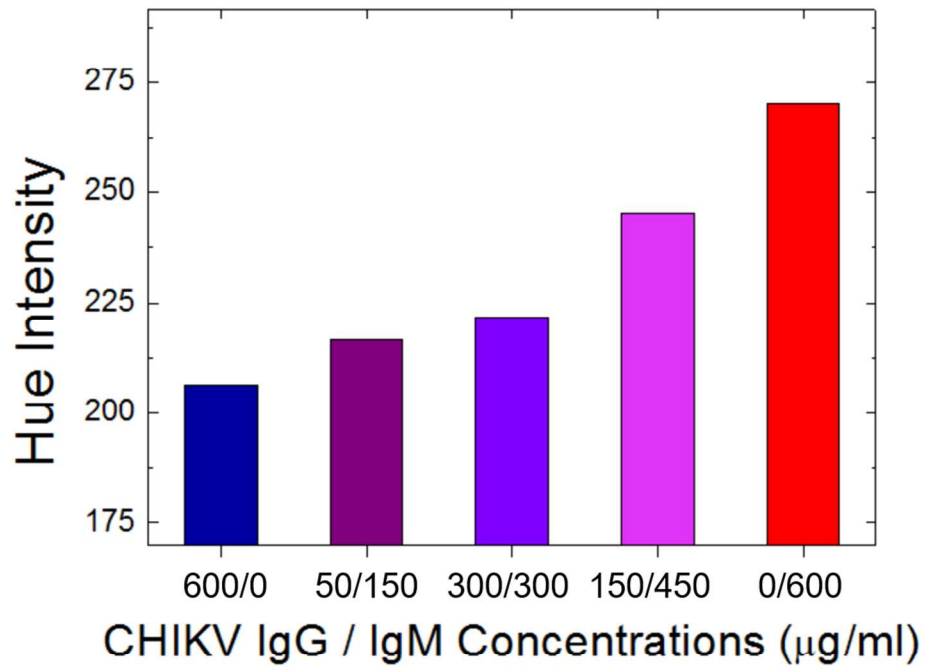

**Figure S.1** Test region hue intensity at different CHIKV IgG/IgM concentrations. Hue values are presented in Table S.1

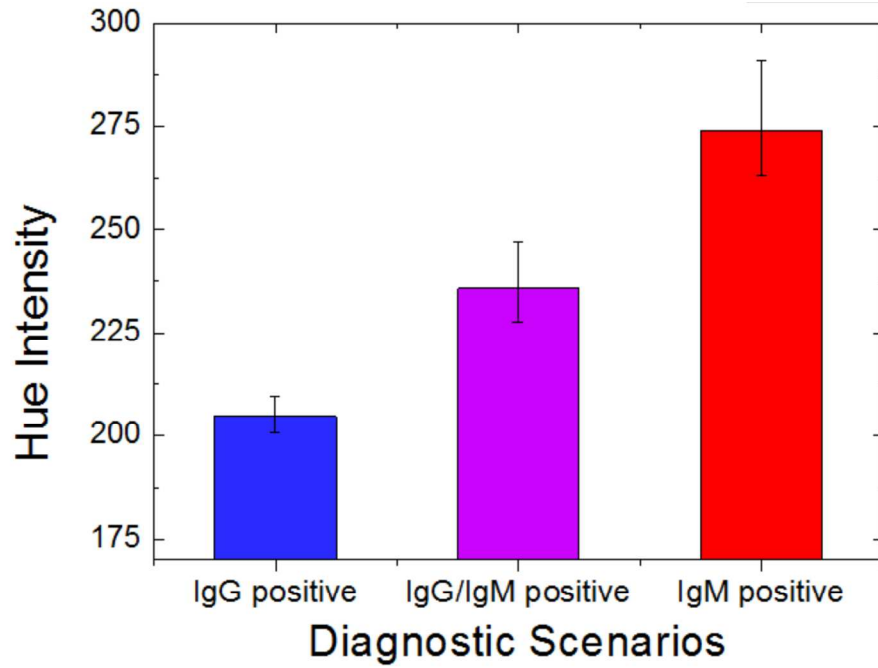

**Figure S.2** Hue intensity and associated diagnostic scenarios from 4-plex testing of anti-CHIKV and anti-DENV IgG/IgM. Hue values are presented in Table S.2
